# Supplementary material for: Evolution of the Gram-Negative Antibiotic Resistance Spiral over Time: A Time-Series Analysis
Source: MDPI journal article supplement (doi:10.3390/antibiotics10060734), 2021-06-17
Supplement: s1 [file s1]

Table S1. Changes in relationships found between drug use and cumulated drug resistance of all Gram-negative bacteria over time in vector autoregressive (VAR) models. These models also include use of other drug groups (fluoroquinolones, aminoglycosides as well as cephalosporins and carbapenems where applicable.)

| impulse                   | response               | lags and highest magnitude of significant response (CI) in the response horizon |                                   |                                  |                                                  |                                      |                                                   |                                      |                                                  |                                  |                                   |
|---------------------------|------------------------|---------------------------------------------------------------------------------|-----------------------------------|----------------------------------|--------------------------------------------------|--------------------------------------|---------------------------------------------------|--------------------------------------|--------------------------------------------------|----------------------------------|-----------------------------------|
|                           |                        | 2015                                                                            |                                   | 2016                             |                                                  | 2017                                 |                                                   | 2018                                 |                                                  | 2019                             |                                   |
|                           |                        | forward                                                                         | reciprocal <sup>1</sup>           | forward                          | reciprocal <sup>1</sup>                          | forward                              | reciprocal <sup>1</sup>                           | forward                              | reciprocal <sup>1</sup>                          | forward                          | reciprocal <sup>1</sup>           |
| cephalo-<br>sporin<br>use | cephalo-<br>sporin R   | 1-12<br>0.352<br>(0.076 – 0.669)                                                | NSR<br>1.967<br>(-0.621 – 3.041)  | 1-12<br>0.580<br>(0.165 – 0.823) | 5-12<br>2.402<br>(0.398 – 3.064)                 | 4-12<br>0.529<br>(0.132 – 0.814)     | 3-12<br>2.930<br>(1.161 – 3.673)                  | 3-12<br>0.739<br>(0.183 – 0.976)     | 3-12<br>2.730<br>(1.333 – 3.594)                 | 3-12<br>0.743<br>(0.230 – 0.958) | 3-12<br>2.805<br>(0.864 – 3.852)  |
| cephalo-<br>sporin R      | carba-<br>penem<br>use | 1-12<br>0.684<br>(0.153 – 0.892)                                                | NSR<br>0.027<br>(-0.093 – 0.142)  | 2-12<br>0.633<br>(0.171 – 0.911) | NSR<br>0.000<br>(-0.128 – 0.115)                 | 1-12<br>0.615<br>(0.105 – 0.920)     | NSR<br>-0.065<br>(-0.288 – 0.152)                 | 2-12<br>0.513<br>(0.044 – 0.718)     | NSR<br>-0.042<br>(-0.297 – 0.184)                | 3-12<br>0.434<br>(0.053 – 0.654) | NSR<br>0.009<br>(-0.210 – 0.235)  |
| carba-<br>penem<br>use    | carba-<br>penem R      | 1-2;<br>0.110<br>(0.040 – 0.157)                                                | NSR<br>-0.042<br>(-0.362 – 0.293) | 1<br>0.076<br>(0.015 – 0.129)    | NSR<br>-0.099<br>(-0.465 – 0.314)                | 1, 3-12;<br>0.342<br>(0.049 – 0.548) | NSR<br>-0.050<br>(-0.361 – 0.236)                 | 1, 3-12;<br>0.381<br>(0.058 – 0.592) | NSR<br>-0.048<br>(-0.284 – 0.229)                | 4-12<br>0.352<br>(0.037 – 0.519) | NSR<br>0.014<br>(-0.299 – 0.308)  |
| carba-<br>penem<br>R      | colistin<br>use        | 1-12<br>0.284<br>(0.091 – 0.429)                                                | NSR<br>-0.229<br>(-0.438 – 0.089) | 1-12<br>0.250<br>(0.069 – 0.457) | 2-12<br>-0.288 <sup>2</sup><br>(-0.472 – -0.028) | 1-6<br>0.105<br>(0.046 – 0.144)      | 3-12;<br>-0.270 <sup>2</sup><br>(-0.425 – -0.023) | 1-7<br>0.150<br>(0.069 – 0.183)      | 6-12<br>-0.279 <sup>2</sup><br>(-0.470 – -0.025) | 1-12<br>0.288<br>(0.032 – 0.433) | NSR<br>-0.117<br>(-0.326 – 0.058) |

<sup>1</sup> The reciprocal effect means a switched the role of variables, the impulse is the former response and the response is the former impulse, e.g. reciprocal effect of carbapenem resistance on colistin use means the effect of colistin use on carbapenem resistance.

<sup>2</sup> Negative values indicate that the association is inverse, i.e. the impulse leads to significant decrease of the response.

CI: 95% confidence intervals; R: resistance; NSR: no significant response over the response horizon

Table S2. Relationships found between drug use and drug resistance of different Gram-negative bacteria by species.

| spe-<br>cies            | impulse<br>→<br>response            | lags and highest magnitude of significant response (CI) in the response horizon |                                   |                                   |                                   |                                   |                                   |                                   |                                                 |                                   |                                                 |
|-------------------------|-------------------------------------|---------------------------------------------------------------------------------|-----------------------------------|-----------------------------------|-----------------------------------|-----------------------------------|-----------------------------------|-----------------------------------|-------------------------------------------------|-----------------------------------|-------------------------------------------------|
|                         |                                     | 2015                                                                            |                                   | 2016                              |                                   | 2017                              |                                   | 2018                              |                                                 | 2019                              |                                                 |
|                         |                                     | forward                                                                         | reciprocal <sup>1</sup>           | forward                           | reciprocal <sup>1</sup>           | forward                           | reciprocal <sup>1</sup>           | forward                           | reciprocal <sup>1</sup>                         | forward                           | reciprocal <sup>1</sup>                         |
| <i>Escherichia coli</i> | cephalosporin use → cephalosporin R | 7-12<br>0.141<br>(0.027 – 0.192)                                                | NSR<br>1.419<br>(-0.121 – 2.403)  | 3-12<br>0.179<br>(0.075 – 0.238)  | 9-12<br>1.889<br>(0.235 – 2.949)  | 3-12<br>0.304<br>(0.100 – 0.365)  | 3-12<br>2.319<br>(0.273 – 3.505)  | 2-12<br>0.344<br>(0.119 – 0.428)  | 4-12<br>2.167<br>(0.023 – 3.475)                | NSR<br>0.086<br>(-0.032 – 0.171)  | NSR<br>0.847<br>(-0.321 – 1.653)                |
|                         | cephalosporin R → carbapenem use    | 1-12<br>0.337<br>(0.029 – 0.567)                                                | NSR<br>0.028<br>(-0.016 – 0.057)  | 1-9<br>0.352<br>(0.053 – 0.585)   | NSR<br>0.019<br>(-0.016 – 0.054)  | NSR<br>0.087<br>(-0.271 – 0.347)  | NSR<br>-0.019<br>(-0.095 – 0.055) | NSR<br>0.169<br>(-0.265 – 0.629)  | NSR<br>-0.037<br>(-0.129 – 0.076)               | NSR<br>0.224<br>(-0.174 – 0.479)  | NSR<br>-0.050<br>(-0.133 – 0.051)               |
|                         | carbapenem use → carbapenem R       | not examined <sup>2</sup>                                                       |                                   |                                   |                                   |                                   |                                   |                                   |                                                 |                                   |                                                 |
|                         | carbapenem R → colistin use         | not examined <sup>2</sup>                                                       |                                   |                                   |                                   |                                   |                                   |                                   |                                                 |                                   |                                                 |
| <i>Klebsiella spp</i>   | cephalosporin use → cephalosporin R | 1-6<br>0.153<br>(0.015 – 0.240)                                                 | NSR<br>1.118<br>(-0.606 – 2.635)  | NSR<br>0.318<br>(-0.102 – 0.564)  | NSR<br>-0.026<br>(-0.129 – 0.082) | NSR<br>0.141<br>(-0.057 – 0.249)  | NSR<br>1.695<br>(-0.167 – 3.103)  | NSR<br>0.151<br>(-0.049 – 0.281)  | NSR<br>0.738<br>(-0.334 – 1.817)                | 4-12<br>0.367<br>(0.143 – 0.470)  | 3-12<br>2.305<br>(0.186 – 3.798)                |
|                         | cephalosporin R → carbapenem use    | NSR<br>0.272<br>(-0.142 – 0.588)                                                | NSR<br>-0.006<br>(-0.153 – 0.118) | NSR<br>0.078<br>(-0.071 – 0.190)  | NSR<br>0.163<br>(-0.518 – 0.726)  | NSR<br>0.437<br>(-0.019 – 0.662)  | NSR<br>-0.025<br>(-0.155 – 0.128) | 3<br>0.221<br>(0.019 – 0.397)     | NSR<br>-0.012<br>(-0.153 – 0.116)               | NSR<br>0.173<br>(-0.205 – 0.566)  | NSR<br>-0.035<br>(-0.110 – 0.191)               |
|                         | carbapenem use → carbapenem R       | 1-4<br>-0.006 <sup>3</sup><br>(-0.009 – -0.002)                                 | NSR<br>0.057<br>(-0.314 – 0.337)  | NSR<br>0.003<br>(-0.006 – 0.014)  | NSR<br>-0.170<br>(-0.449 – 0.343) | NSR<br>-0.005<br>(-0.023 – 0.012) | NSR<br>0.094<br>(-0.265 – 0.363)  | NSR<br>-0.008<br>(-0.030 – 0.012) | NSR<br>0.099<br>(-0.165 – 0.436)                | NSR<br>-0.007<br>(-0.029 – 0.022) | NSR<br>-0.082<br>(-0.351 – 0.409)               |
|                         | carbapenem R → colistin use         | 1-12<br>0.172<br>(0.021 – 0.250)                                                | NSR<br>0.004<br>(-0.002 – 0.008)  | 1-12<br>0.170<br>(0.037 – 0.286)  | NSR<br>0.004<br>(-0.004 – 0.010)  | 1-12<br>0.131<br>(0.010 – 0.214)  | NSR<br>0.004<br>(-0.009 – 0.015)  | NSR<br>0.061<br>(-0.059 – 0.223)  | 1-2<br>-0.015 <sup>3</sup><br>(-0.022 – -0.006) | NSR<br>-0.193<br>(-0.361 – 0.034) | 1-3<br>-0.021 <sup>3</sup><br>(-0.029 – -0.010) |
| <i>Pseudomonas</i>      | cephalosporin use → cephalosporin R | NSR<br>0.102<br>(-0.122 – 0.260)                                                | NSR<br>1.203<br>(-0.249 – 2.131)  | NSR<br>-0.043<br>(-0.153 – 0.113) | NSR<br>0.208<br>(-0.674 – 0.831)  | NSR<br>0.087<br>(-0.087 – 0.274)  | NSR<br>1.241<br>(-0.237 – 2.179)  | NSR<br>0.203<br>(-0.066 – 0.391)  | 3-12<br>2.291<br>(0.377 – 3.259)                | NSR<br>-0.205<br>(-0.308 – 0.061) | NSR<br>0.003<br>(-0.133 – 0.127)                |

|                                |                                       |                                  |                                                  |                                  |                                                  |                                     |                                   |                                  |                                   |                                     |                                   |
|--------------------------------|---------------------------------------|----------------------------------|--------------------------------------------------|----------------------------------|--------------------------------------------------|-------------------------------------|-----------------------------------|----------------------------------|-----------------------------------|-------------------------------------|-----------------------------------|
|                                | cephalosporin R<br>→carbapenem<br>use | NSR<br>0.251<br>(-0.214 – 0.551) | NSR<br>0.009<br>(-0.090 – 0.113)                 | 6-12<br>0.570<br>(0.115 – 0.690) | NSR<br>0.011<br>(-0.123 – 0.116)                 | NSR<br>0.386<br>(-0.147 – 0.686)    | NSR<br>-0.042<br>(-0.189 – 0.157) | NSR<br>0.230<br>(-0.104 – 0.592) | NSR<br>-0.023<br>(-0.169 – 0.109) | NSR<br>0.109<br>(-0.248 – 0.432)    | NSR<br>0.003<br>(-0.133 – 0.127)  |
|                                | carbapenem<br>use→carba-<br>penem R   | NSR<br>0.084<br>(-0.048 – 0.182) | NSR<br>0.332<br>(-0.091 – 0.639)                 | 1<br>0.043<br>(0.012 – 0.074)    | NSR<br>0.153<br>(-0.120 – 0.377)                 | NSR<br>0.047<br>(-0.036 – 0.108)    | NSR<br>0.086<br>(-0.128 – 0.282)  | NSR<br>0.061<br>(-0.045 – 0.137) | NSR<br>0.132<br>(-0.127 – 0.329)  | NSR<br>0.045<br>(-0.028 – 0.114)    | NSR<br>0.150<br>(-0.109 – 0.360)  |
|                                | carbapenem R<br>→colistin use         | 1-6<br>0.144<br>(0.020 – 0.245)  | 2-12<br>-0.174 <sup>3</sup><br>(-0.244 – -0.030) | 2-12<br>0.207<br>(0.034 – 0.359) | 1-12<br>-0.166 <sup>3</sup><br>(-0.239 – -0.048) | NSR<br>0.024<br>(-0.080 – 0.160)    | NSR<br>-0.066<br>(-0.150 – 0.049) | NSR<br>0.038<br>(-0.094 – 0.177) | NSR<br>-0.083<br>(-0.142 – 0.026) | NSR<br>0.120<br>(-0.093 – 0.258)    | NSR<br>-0.019<br>(-0.077 – 0.053) |
| <i>Acinetobacter baumannii</i> | cephalosporin use<br>→cephalosporin R | not examined <sup>4</sup>        |                                                  |                                  |                                                  |                                     |                                   |                                  |                                   |                                     |                                   |
|                                | cephalosporin R<br>→carbapenem<br>use | not examined <sup>4</sup>        |                                                  |                                  |                                                  |                                     |                                   |                                  |                                   |                                     |                                   |
|                                | carbapenem use<br>→carbapenem R       | 1-3<br>0.071<br>(0.025 – 0.107)  | NSR<br>-0.192<br>(-0.576 – 0.166)                | 1-4<br>0.123<br>(0.036 – 0.193)  | NSR<br>-0.238<br>(-0.476 – 0.066)                | 1, 3-12<br>0.252<br>(0.045 – 0.430) | NSR<br>-0.251<br>(-0.486 – 0.113) | 1-12<br>0.344<br>(0.097 – 0.507) | NSR<br>-0.207<br>(-0.446 – 0.038) | 1, 3-12<br>0.294<br>(0.036 – 0.444) | NSR<br>-0.143<br>(-0.455 – 0.155) |
|                                | carbapenem R<br>→colistin use         | 1-12<br>0.271<br>(0.081 – 0.466) | NSR<br>-0.020<br>(-0.151 – 0.135)                | 1-2<br>0.096<br>(0.029 – 0.135)  | NSR<br>-0.108<br>(-0.223 – 0.074)                | 1-4<br>0.133<br>(0.056 – 0.179)     | NSR<br>-0.113<br>(-0.253 – 0.068) | 1-5<br>0.154<br>(0.082 – 0.194)  | NSR<br>-0.043<br>(-0.185 – 0.083) | 1-12<br>0.317<br>(0.082 – 0.481)    | NSR<br>-0.166<br>(-0.320 – 0.060) |

<sup>1</sup> The reciprocal effect means that the impulse is the former response and the response is the former impulse, e.g. reciprocal effect of carbapenem

resistance on colistin use means the effect of colistin use on carbapenem resistance.

<sup>2</sup> As carbapenem resistance in *E. coli* was extremely rare in the study period, these associations were not tested.

<sup>3</sup> Negative values indicate that the association is inverse, i.e. the impulse leads to significant decrease of the response.

<sup>4</sup> As in case of *A. baumannii* cephalosporin susceptibility is not tested and all isolates are interpreted as cephalosporin resistant, these associations were not tested.

CI: 95% confidence intervals R: resistance NSR: no significant response over the response horizon

Table S3. Changes in relationships found over the complete resistance spiral over time. Light shading marks significant relationships, dark shading marks significant reciprocal associations.

| impulse                                        | response                                       | lags and highest magnitude of significant response (CI) in the response horizon |                                                  |                                  |                                                  |                                  |                                                  |                                  |                                                 |                                  |                                   |
|------------------------------------------------|------------------------------------------------|---------------------------------------------------------------------------------|--------------------------------------------------|----------------------------------|--------------------------------------------------|----------------------------------|--------------------------------------------------|----------------------------------|-------------------------------------------------|----------------------------------|-----------------------------------|
|                                                |                                                | 2015                                                                            |                                                  | 2016                             |                                                  | 2017                             |                                                  | 2018                             |                                                 | 2019                             |                                   |
|                                                |                                                | forward                                                                         | reciprocal <sup>1</sup>                          | forward                          | reciprocal <sup>1</sup>                          | forward                          | reciprocal <sup>1</sup>                          | forward                          | reciprocal <sup>1</sup>                         | forward                          | reciprocal <sup>1</sup>           |
| cephalo-<br>sporin use                         | cephalo-<br>sporin R in<br><i>E. coli</i>      | NSR<br>0.013<br>(-0.044 – 0.056)                                                | NSR<br>0.021<br>(-0.619 – 0.521)                 | NSR<br>0.016<br>(-0.024 – 0.058) | NSR<br>0.223<br>(-0.375 – 0.681)                 | NSR<br>0.010<br>(-0.052 – 0.075) | NSR<br>0.131<br>(-0.460 – 0.470)                 | NSR<br>0.002<br>(-0.080 – 0.081) | NSR<br>0.204<br>(-0.269 – 0.557)                | NSR<br>0.034<br>(-0.079 – 0.101) | NSR<br>0.827<br>(-0.180 – 1.558)  |
| cephalo-<br>sporin R in<br><i>E. coli</i>      | carba-<br>penem use                            | 1-6<br>0.256<br>(0.071 – 0.349)                                                 | NSR<br>0.032<br>(-0.021 – 0.069)                 | 1-7<br>0.236<br>(0.055 – 0.307)  | NSR<br>0.022<br>(-0.022 – 0.069)                 | 1-3<br>0.171<br>(0.053 – 0.278)  | NSR<br>-0.021<br>(-0.072 – 0.060)                | NSR<br>0.196<br>(-0.146 – 0.537) | NSR<br>-0.039<br>(-0.113 – 0.082)               | NSR<br>0.095<br>(-0.330 – 0.444) | NSR<br>-0.052<br>(-0.123 – 0.026) |
| carba-<br>penem use                            | carbap.<br>R in <i>P.</i><br><i>aeruginosa</i> | NSR<br>0.064<br>(-0.071 – 0.155)                                                | NSR<br>0.118<br>(-0.225 – 0.382)                 | NSR<br>0.003<br>(-0.096 – 0.083) | NSR<br>0.133<br>(-0.191 – 0.352)                 | NSR<br>0.029<br>(-0.093 – 0.104) | NSR<br>0.185<br>(-0.170 – 0.425)                 | NSR<br>0.037<br>(-0.076 – 0.116) | NSR<br>0.159<br>(-0.121 – 0.384)                | NSR<br>0.049<br>(-0.042 – 0.120) | NSR<br>0.148<br>(-0.151 – 0.422)  |
| carba-<br>penem use                            | carbap.<br>R in <i>A.</i><br><i>baumannii</i>  | NSR<br>0.095<br>(-0.089 – 0.197)                                                | NSR<br>-0.297<br>(-0.564 – 0.142)                | NSR<br>0.119<br>(-0.029 – 0.229) | 2-4<br>-0.195 <sup>2</sup><br>(-0.307 – -0.041)  | 1-4<br>0.107<br>(0.022 – 0.164)  | 2-4<br>-0.189 <sup>2</sup><br>(-0.282 – -0.041)  | 1-12<br>0.292<br>(0.059 – 0.410) | 3-4<br>-0.134 <sup>2</sup><br>(-0.292 – -0.017) | 1-12<br>0.326<br>(0.046 – 0.424) | NSR<br>-0.045<br>(-0.287 – 0.135) |
| carbap.<br>R in <i>P.</i><br><i>aeruginosa</i> | colistin use                                   | NSR<br>0.178<br>(-0.015 – 0.269)                                                | 1-12<br>-0.178 <sup>2</sup><br>(-0.226 – -0.024) | 3-6<br>0.118<br>(0.011 – 0.217)  | 1-12<br>-0.183 <sup>2</sup><br>(-0.241 – -0.062) | NSR<br>0.024<br>(-0.121 – 0.142) | 2-12<br>-0.126 <sup>2</sup><br>(-0.174 – -0.024) | NSR<br>0.048<br>(-0.084 – 0.204) | NSR<br>-0.096<br>(-0.152 – 0.023)               | NSR<br>0.042<br>(-0.116 – 0.136) | NSR<br>-0.056<br>(-0.109 – 0.020) |
| carbap.<br>R in <i>A.</i><br><i>baumannii</i>  | colistin use                                   | 1-6<br>0.112<br>(0.034 – 0.140)                                                 | NSR<br>-0.038<br>(-0.162 – 0.101)                | 1-3<br>0.110<br>(0.035 – 0.140)  | NSR<br>-0.087<br>(-0.162 – 0.062)                | 1-9<br>0.113<br>(0.058 – 0.151)  | NSR<br>-0.186<br>(-0.305 – 0.028)                | 1-10<br>0.193<br>(0.018 – 0.301) | NSR<br>-0.178<br>(-0.317 – 0.056)               | 1-12<br>0.295<br>(0.096 – 0.360) | NSR<br>0.144<br>(-0.334 – 0.064)  |

<sup>1</sup> The reciprocal effect means a switched the role of variables, the impulse is the former response and the response is the former impulse, e.g. reciprocal effect of cephalosporin use on cephalosporin resistance means the effect of cephalosporin resistance on cephalosporin use

<sup>2</sup> Negative values indicate that the association is inverse, i.e. the impulse leads to significant decrease of the response.

CI: 95% confidence intervals; R: resistance; NSR: no significant response over the response horizon
